# Supplementary material for: Newborn screening for mucopolysaccharidoses: a pilot study of measurement of glycosaminoglycans by tandem mass spectrometry
Source: Springer Nature journal article supplement (doi:10.1007/s10545-016-9981-6), 2016-10-07
Supplement: MOESM2 [file 10838668]

Sup.2: Predictive positive value (PPV) and negative predictive values (NPV), sensitivity and specificity for HS-0S, HS-NS and DS

| HS-0S | Condition positive | Condition negative |  |
| --- | --- | --- | --- |
| Test outcome positive | TP=14 | FP=72 | PPV=16% |
| Test outcome negative | FN=0 | TN=2790 | NPV= 97% |
|  | Sensitivity= 100% | Specificity= 97% |  |

| HS-NS | Condition positive | Condition negative |  |
| --- | --- | --- | --- |
| Test outcome positive | TP=14 | FP=179 | PPV=7% |
| Test outcome negative | FN=0 | TN=2683 | NPV= 94% |
|  | Sensitivity= 100% | Specificity= 94% |  |

| DS | Condition positive | Condition negative |  |
| --- | --- | --- | --- |
| Test outcome positive | TP=9 | FP=42 | PPV=18% |
| Test outcome negative | FN=0 | TN=2820 | NPV= 98% |
|  | Sensitivity= 100% | Specificity= 98% |  |
