# Supplementary figures and images for: Newborn screening for mucopolysaccharidoses: a pilot study of measurement of glycosaminoglycans by tandem mass spectrometry
Source: Springer Nature journal article supplement (doi:10.1007/s10545-016-9981-6), 2016-10-07

Sup 4: Chromatograms for HS-NS in control and MPS newborn patients


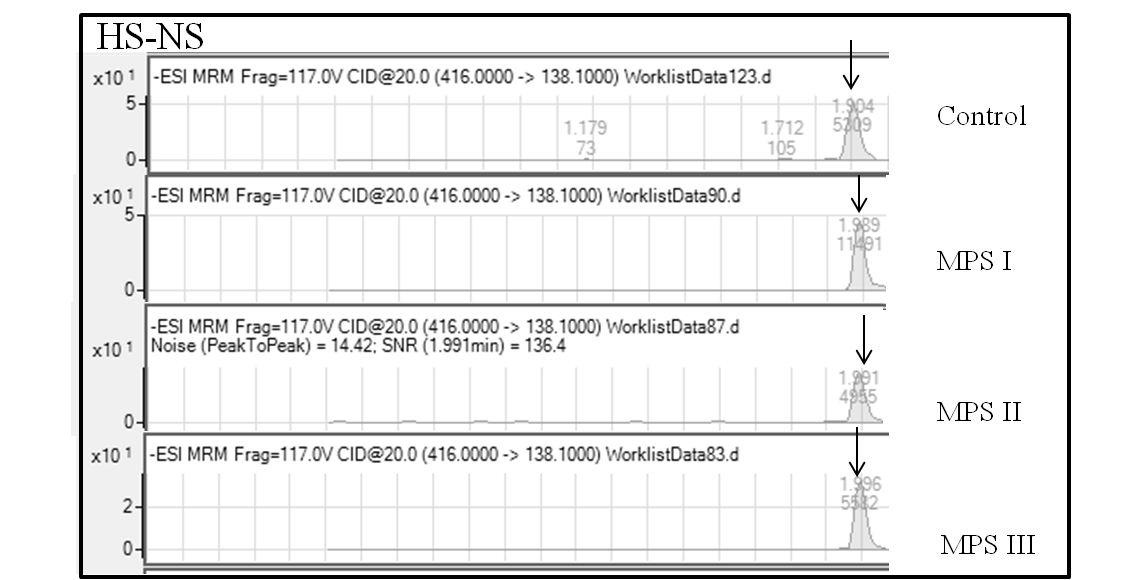

Supplement: MOESM4 [file 10838668]
